# Supplementary material for: MORF and MOZ acetyltransferases target unmethylated CpG islands through the winged helix domain
Source: Springer Nature journal article supplement (doi:10.1038/s41467-023-36368-5), 2023-02-08
Supplement: MOESM1 [file 41467_2023_36368_MOESM1_ESM.pdf]

## **Supplementary Information**

### **MORF and MOZ acetyltransferases target unmethylated CpG islands through the winged helix domain**

Dustin C. Becht, et al.

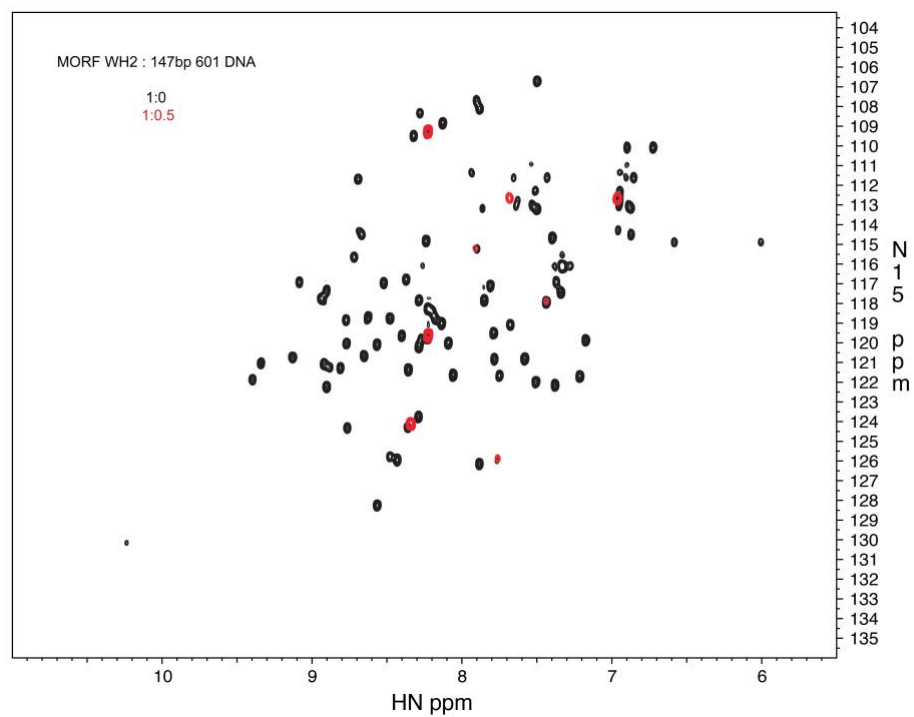

**Supplementary Figure 1.** Overlay of  $^1\text{H}$ ,  $^{15}\text{N}$  HSQC spectra of MORF<sub>WH2</sub> in the absence (black) and presence of 601 DNA (red). Related to Figure 1.

a

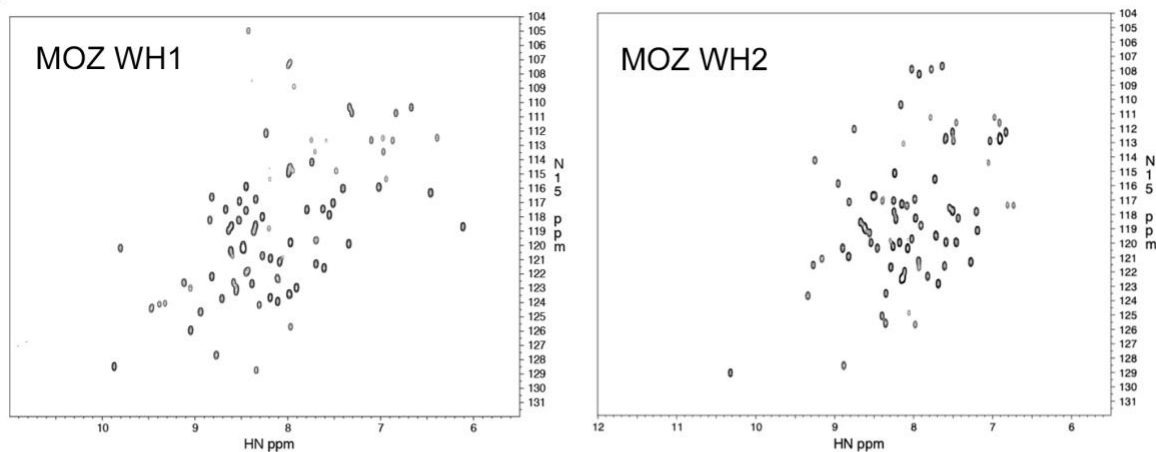

b

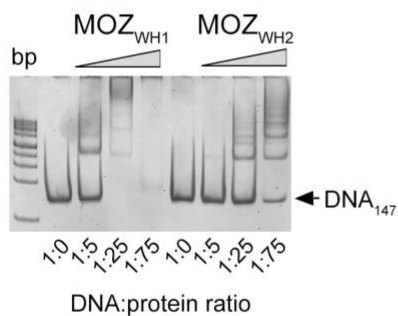

c

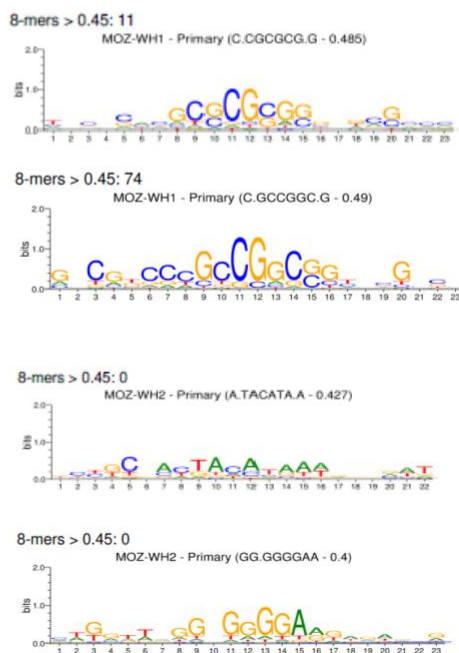

**Supplementary Figure 2.** (a)  $^1\text{H}$ ,  $^{15}\text{N}$  HSQC spectra of MOZ<sub>WH1</sub> and MOZ<sub>WH2</sub>. (b) EMSA of 147bp 601 DNA in the presence of increasing amounts of MOZ<sub>WH1</sub> and MOZ<sub>WH2</sub>. DNA:protein ratio is shown below the gel image. (c) Analysis of DNA binding selectivity of MOZ<sub>WH1</sub> and MOZ<sub>WH2</sub> in universal oligonucleotide PBM arrays. Related to Figures 1 and 3. Source data are provided as a Source Data file.

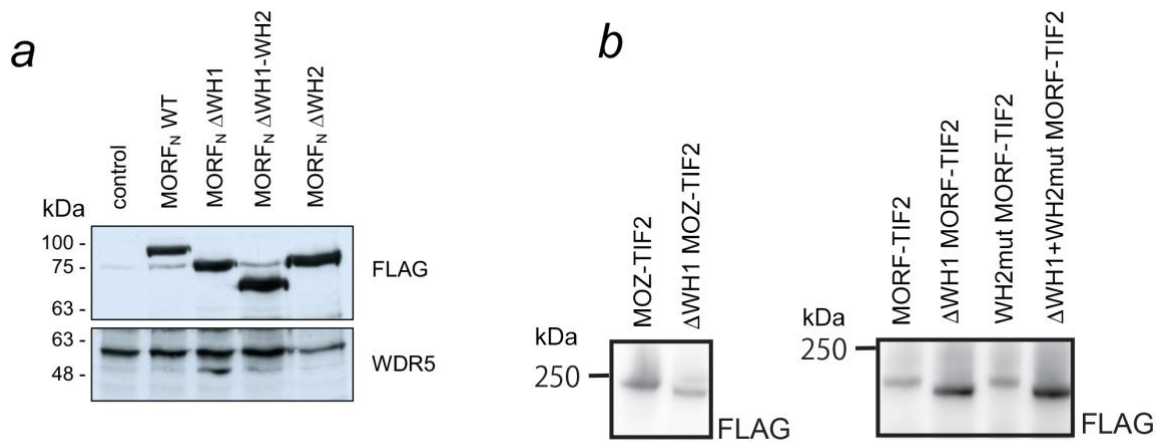

**Supplementary Figure 3.** Western-Blot showing expression of the indicated MORF and MOZ constructs. (a) FLAG-MORF<sub>N1-716</sub> WT, ΔWH1, ΔWH2 and ΔWH1-WH2 in the respective K562 cell lines used for ChIP experiments. WDR5 signal is used as loading control. (b) Protein expression of FLAG-tagged MOZ/MORF-TIF2 fusion constructs in plat-E cells. The whole cell extracts were analyzed by Western-Blotting using anti-FLAG antibody. Related to Figures 1 and 6. Source data are provided as a Source Data file.



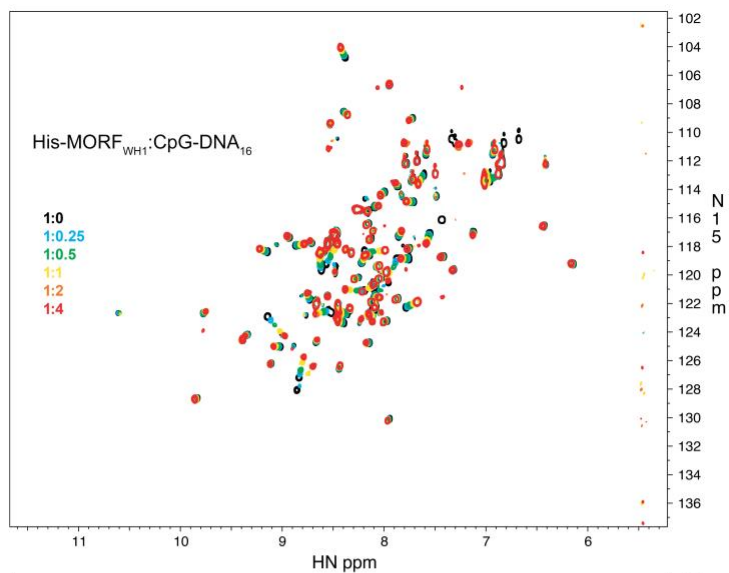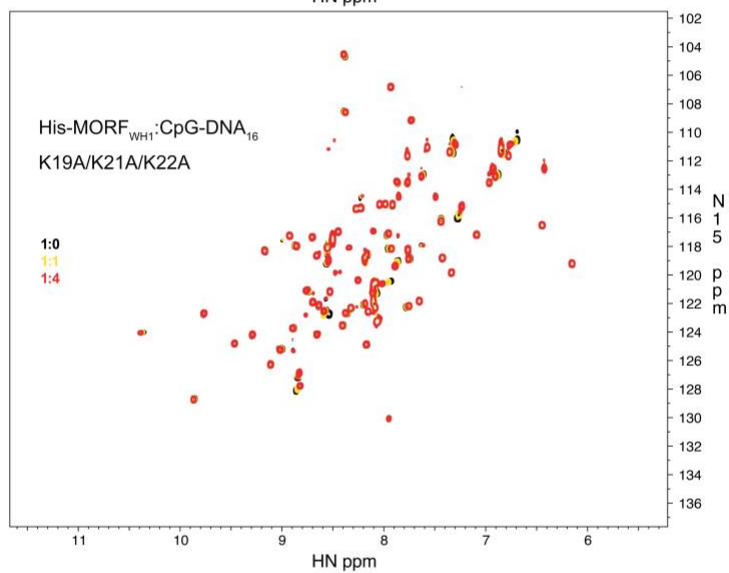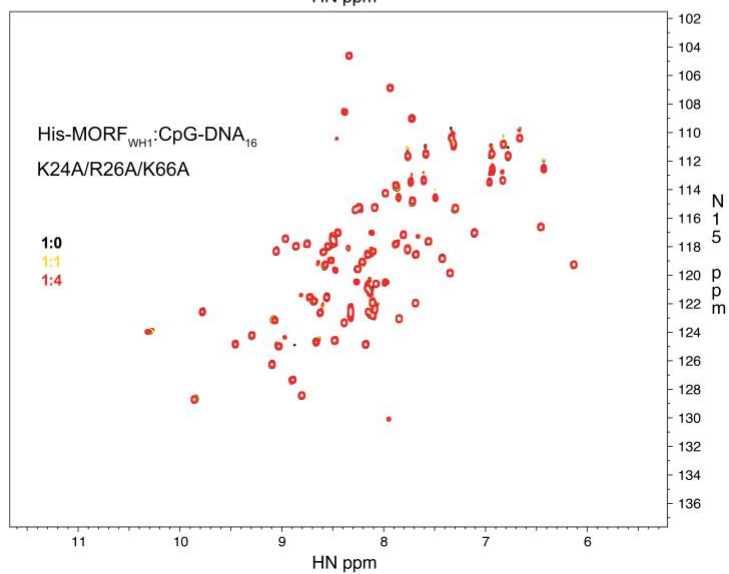

**Supplementary Figure 5.** Overlay of  $^1\text{H}$ ,  $^{15}\text{N}$  HSQC spectra of  $^{15}\text{N}$ -labeled His-MORF<sub>WH1</sub>, WT or K19A/K21A/K22A and K24A/R26A/K66A mutants in the presence of increasing amount of CpG-DNA<sub>16</sub>. Spectra are color coded according to the protein:DNA molar ratio. Related to Figure 3.

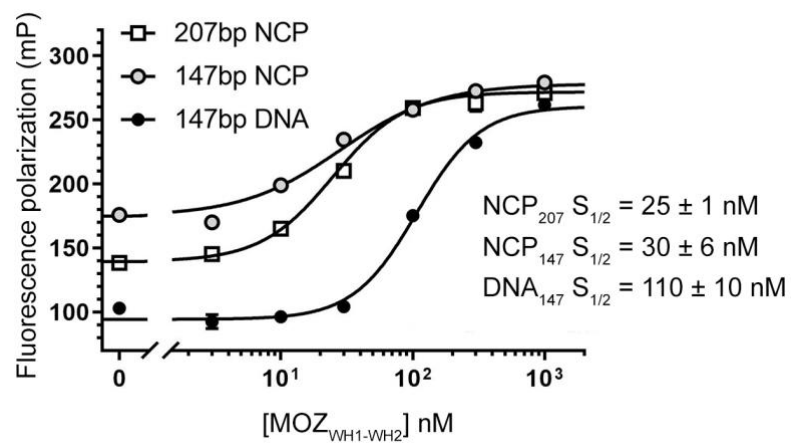

**Supplementary Figure 6.** Binding curves for the interactions of MOZ<sub>WH1-WH2</sub> with NCP<sub>207</sub>, NCP<sub>147</sub> and DNA<sub>147</sub> as measured by fluorescence polarization. Data represent mean  $\pm$  SD of three independent experiments. n=3 Related to Figure 7. Source data are provided as a Source Data file.

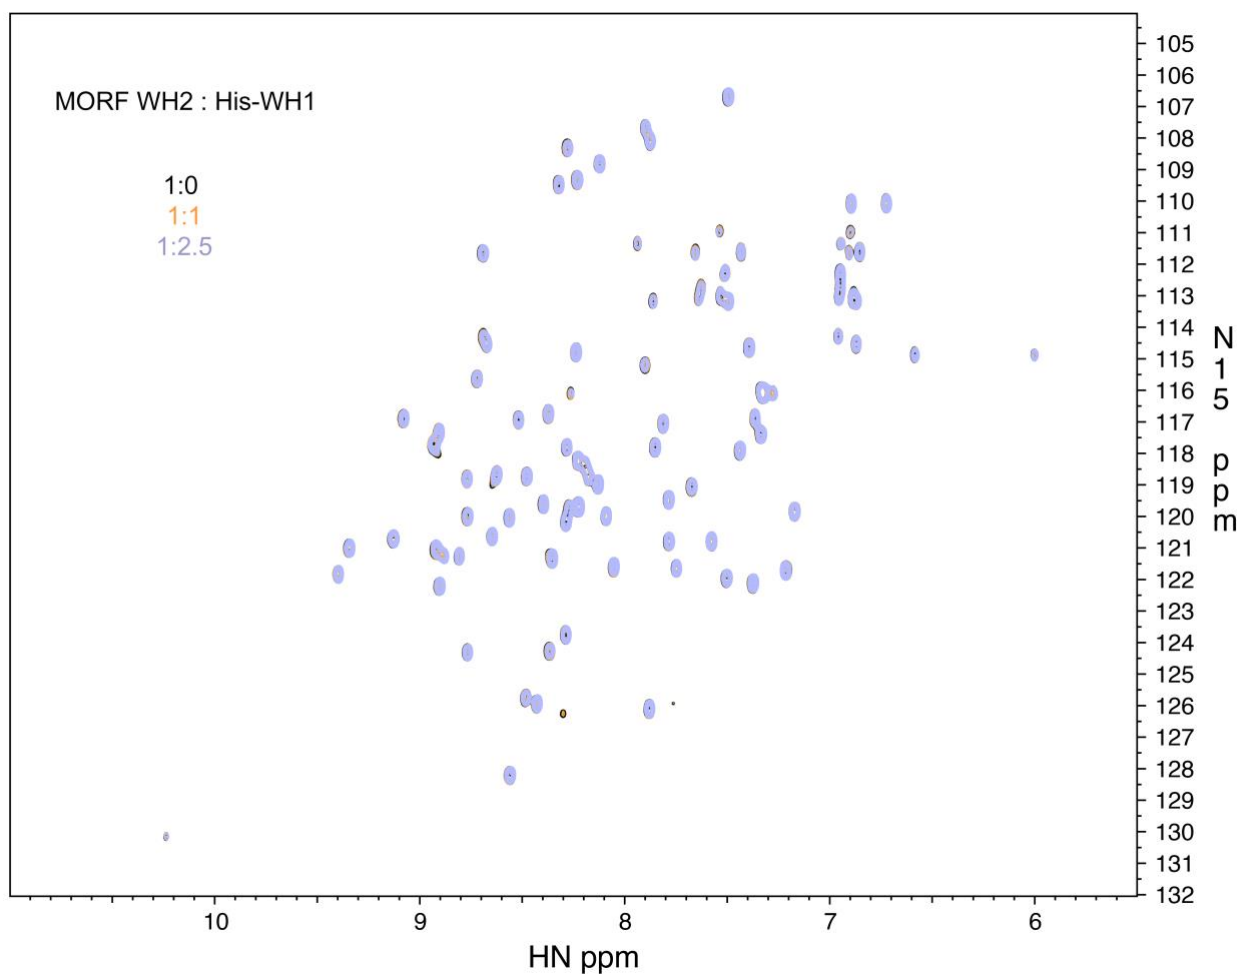

**Supplementary Figure 7.** Overlay of  $^1\text{H}$ ,  $^{15}\text{N}$  HSQC spectra of  $^{15}\text{N}$ -labeled MORF<sub>WH2</sub> in the presence of increasing amount of unlabeled His-MORF<sub>WH1</sub>. Spectra are color coded according to the protein:ligand molar ratio. Related to Figure 7.



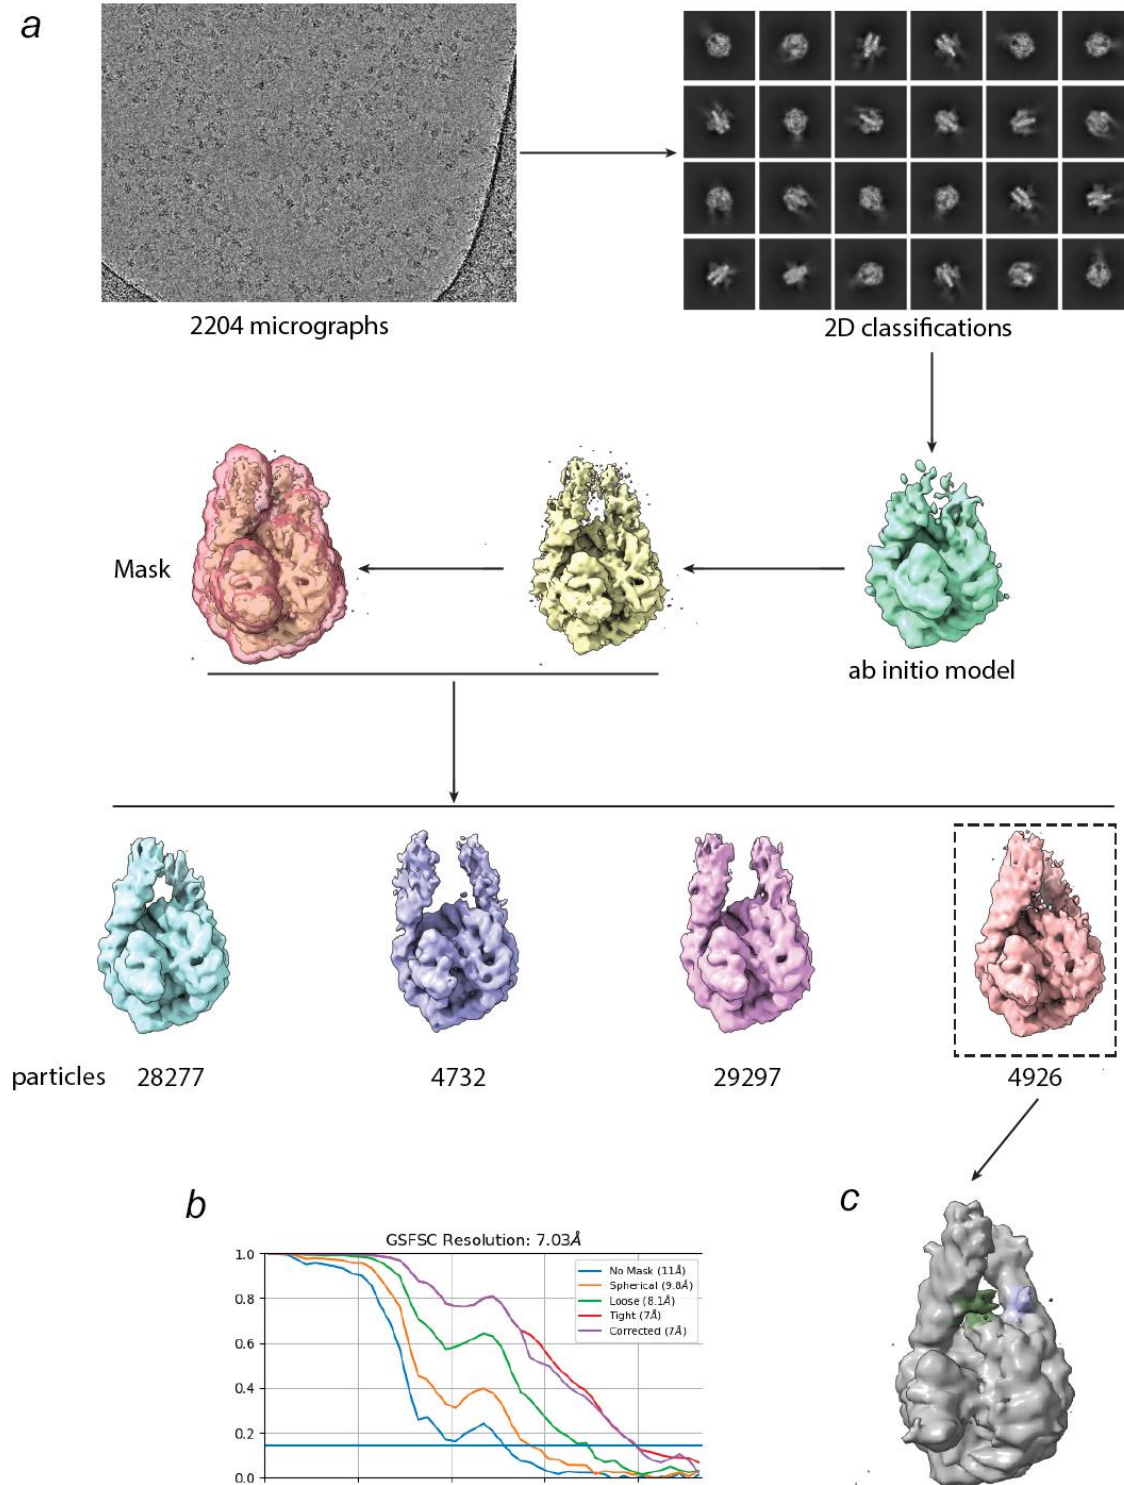

**Supplementary Figure 8.** Cryo-EM reconstruction of MORF<sub>WH1-WH2</sub>-Nucleosome-scFv complex. (a) Workflow of the cryo-EM image processing. (b) Fourier Shell Correlations (FSC) of the reconstruction. Gold-standard cut-off (FSC=0.143) marked with a blue line. (c) Final cryo-EM map of the MORF<sub>WH1-WH2</sub>-nucleosome-scFv complex, the density near the dyad region is colored in green and light blue. Related to Figure 8.

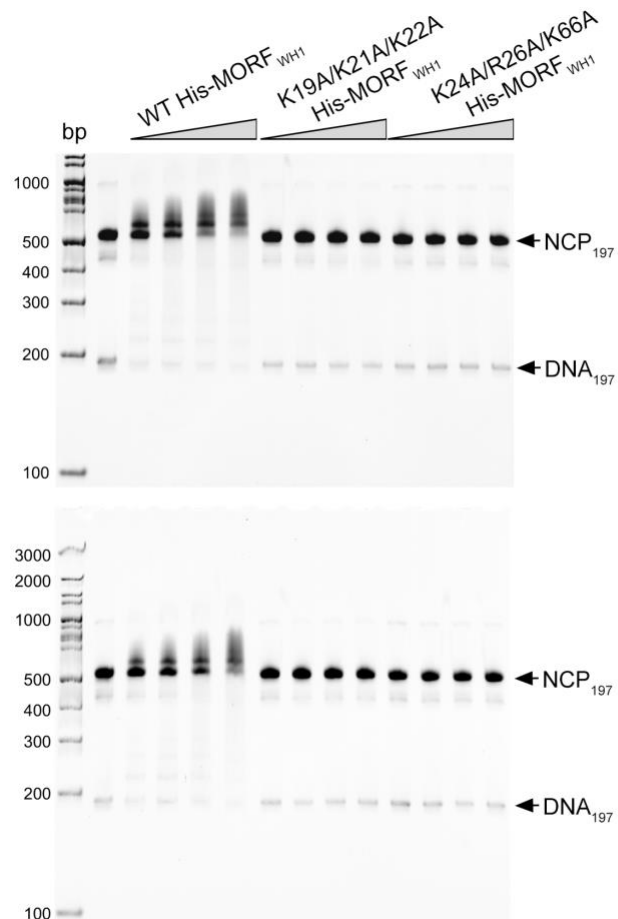

**Supplementary Figure 9.** Two replicates of EMSA of 197 bp NCP (NCP<sub>197</sub>) in the presence of increasing amounts of indicated WT or mutated His-MORF<sub>WH1</sub>. Related to Figure 8. Source data are provided as a Source Data file.

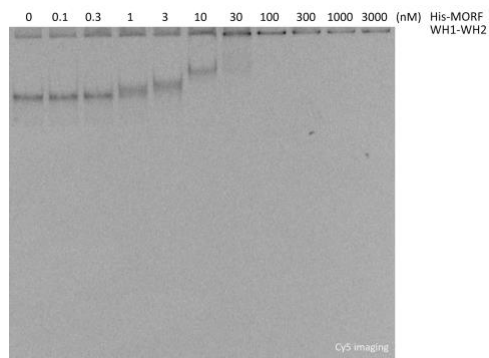

**Supplementary Figure 10.** EMSA of the Cy3-Cy5 labeled NCP<sub>273</sub> in the presence of increasing amounts of His-MORF<sub>WH1-WH2</sub>. Related to Figure 8. Source data are provided as a Source Data file.

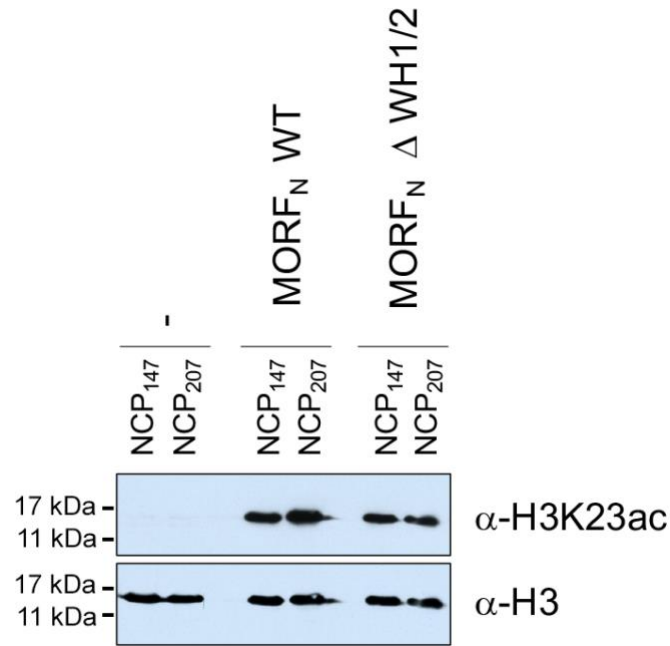

**Supplementary Figure 11.** *In vitro* HAT assays using WT and mutated MORF<sub>N</sub> complexes purified from K562 cells on NCP w/o DNA linkers (NCP<sub>147</sub>) and NCP with the linkers (NCP<sub>207</sub>). Related to Figure 9. Source data are provided as a Source Data file.

**Supplementary Table 1.** NMR and refinement statistics for the MORF<sub>WH2</sub> structures. Related to Figure 2.

|                                                            | MORF <sub>WH2</sub> |
|------------------------------------------------------------|---------------------|
| <b>NMR distance and dihedral constraints</b>               |                     |
| Distance constraints                                       |                     |
| Total NOE                                                  | 1603                |
| Intra-residue                                              | 600                 |
| Inter-residue                                              |                     |
| Sequential ( $ i - j  = 1$ )                               | 390                 |
| Medium-range ( $ i - j  \leq 4$ )                          | 303                 |
| Long-range ( $ i - j  \geq 5$ )                            | 280                 |
| Hydrogen bonds                                             | 40                  |
| Total dihedral angle restraints                            |                     |
| $\phi$                                                     | 54                  |
| $\psi$                                                     | 54                  |
| <b>Structure statistics</b>                                |                     |
| Violations (mean and s.d.)                                 |                     |
| Distance constraints (Å)                                   | $0.054 \pm 0.001$   |
| Dihedral angle constraints (°)                             | $0.842 \pm 0.078$   |
| Number of distance violation ( $> 0.35$ Å)                 | 0                   |
| Number of angle violation ( $> 10^\circ$ )                 | 0                   |
| Deviations from idealized geometry                         |                     |
| Bond lengths (Å)                                           | $0.003 \pm 0.000$   |
| Bond angles (°)                                            | $0.461 \pm 0.023$   |
| Impropers (°)                                              | $0.333 \pm 0.017$   |
| Average pairwise r.m.s. deviation** (Å)                    |                     |
| Heavy                                                      | $2.233 \pm 0.655$   |
| Backbone                                                   | $1.818 \pm 0.743$   |
| Heavy (107-118,126-135,140-144,148-162,165-168,171-174)    | $0.895 \pm 0.094$   |
| Backbone (107-118,126-135,140-144,148-162,165-168,171-174) | $0.309 \pm 0.068$   |

\*\*Pairwise r.m.s. deviation to lowest energy structure was calculated among 15 refined structures. Residues 100-182 of MORF were used.

**Supplementary Table 2.** Taqman probes. Related to Figure 6.

| Oligonucleotides                     |                   |               |
|--------------------------------------|-------------------|---------------|
| Taqman probe for murine <i>Gapdh</i> | Life Technologies | Mm99999915_g1 |
| Taqman probe for murine <i>Hoxa9</i> | Life Technologies | Mm00439364_m1 |

**Supplementary Table 3.** Custom qPCR probe/primer sequences. Related to Figure 6.

| Target name      | Forward                                      | Reverse                                          | Reporter                                |
|------------------|----------------------------------------------|--------------------------------------------------|-----------------------------------------|
| CD4- pre-TSS     | TGTCCGAGCAAGG<br>GATGATATTG<br>GCAGCGGGCAAGA | CCAAGTCACTCTGC<br>ACTACCA<br>ACGTTCCCCTCCCT      | ACTGCCACCATGCC<br>AAT<br>CCGAGTCTGACCAC |
| CD4-TSS          | AAGAC                                        | CTCA                                             | CTTAC                                   |
| CD4- post-TSS    | GGAATCACTGTCCC<br>TCCTGAA                    | CTTCAAGGCCATGA<br>GGTCTCA                        | TCAGCCTTTCCGCC<br>CTC                   |
| MYC pre-TSS      | GCGGTATCTGCTGC<br>TTTGG<br>CCGGCTAGGGTGG     | GCATTATGTATGCA<br>CAGCTATCTGGAT<br>GAGGCGAAGCCCC | CTGGGTGGAAGGT<br>ATCC<br>CAGGACGCCCGCA  |
| MYC-TSS          | AAGAG                                        | CTATTC                                           | GCG                                     |
| MYC post-TSS     | GGGTAGGCGCAGG<br>CA                          | GGTTTTTCCAAGTC<br>AACGATTCCA                     | ATGTGTCCGATTCT<br>CC                    |
| HOXA9 pre-TSS    | TGGCTGCTTTTTTAT<br>GGCTTCAATT                | CCGCGTGCGAGTG<br>C                               | CCCCTCACATAAAA<br>TT                    |
| HOXA9-TSS        | TCACCACCACCCCT<br>ACGT                       | GCAAGCCCGCGAA<br>GGA                             | CAGGAGCGCATGTA<br>CC                    |
| HOXA9 post-TSS   | AGTGGCGGCGTAA<br>ATCCT                       | TGATCACGTCTGTG<br>GCTTATTTGAA                    | CCCGCAGCCTCATC                          |
| CDKN2C- pre-TSS  | CTCCACAACCGTCT<br>TAAATAACAAACC              | GCGGGCTTGAGTCT<br>GTGA                           | CAGCTGCCCCAATT<br>C                     |
| CDKN2C-TSS       | GGCGGCTGCCCTG<br>T                           | CCCGGTGCCACTTT<br>GC                             | CTGTGCCCTTTGC<br>TG                     |
| CDKN2C- post-TSS | CTGTGGAGTCGTCA<br>GAATTCTTCAT                | CGATTCACACGTGA<br>TTATTCAGCAA                    | CCTCGCCTCGCTTT<br>T                     |

**Supplementary Table 4.** Accession numbers of the NGS data. Related to Figures 4-6.

| Sample name                              | DRA accession number | Sample ID    | GEA accession number |
|------------------------------------------|----------------------|--------------|----------------------|
| Input gDNA (CIRA-seq)                    | DRA008734            | SAMD00180208 | E-GEAD-324           |
| Unmethylated CpGs (CIRA-seq)             | DRA008734            | SAMD00180209 | E-GEAD-324           |
| Input chromatin (ChIP)                   | DRA012473            | SAMD00393839 | E-GEAD-446           |
| MOZ <sub>FL</sub> (ChIP)                 | DRA008732            | SAMD00180127 | E-GEAD-322           |
| MEAF6 (ChIP)                             | DRA012473            | SAMD00393844 | E-GEAD-446           |
| ING4 (ChIP)                              | DRA012473            | SAMD00393843 | E-GEAD-446           |
| H3K14ac (ChIP)                           | DRA014291            | SAMD00495580 | E-GEAD-497           |
| RNAP2 non-P (ChIP)                       | DRA012473            | SAMD00393846 | E-GEAD-446           |
| RNAP2 Ser5-P (ChIP)                      | DRA012473            | SAMD00393847 | E-GEAD-446           |
| Vector-FLAG (ChIP)                       | DRA014290            | SAMD00495574 | E-GEAD-498           |
| MOZ <sub>WH1</sub> -FLAG rep1(ChIP)      | DRA014290            | SAMD00495575 | E-GEAD-498           |
| MOZ <sub>WH1</sub> -FLAG rep2 (ChIP)     | DRA014290            | SAMD00495576 | E-GEAD-498           |
| MOZ <sub>WH1</sub> -WH2-DPF-FLAG (ChIP)  | DRA014290            | SAMD00495578 | E-GEAD-498           |
| MOZ <sub>WH2</sub> -DPF-FLAG rep1 (ChIP) | DRA014290            | SAMD00495577 | E-GEAD-498           |
| MOZ-TIF2-FLAG (ChIP)                     | DRA010562            | SAMD00237834 | E-GEAD-381           |
| Vector-FLAG rep2 (ChIP)                  | DRA015383            | SAMD00567463 | E-GEAD-584           |
| MOZ <sub>WH1</sub> -FLAG rep3 (ChIP)     | DRA015383            | SAMD00567464 | E-GEAD-584           |
| MORF <sub>WH1</sub> -FLAG rep1(ChIP)     | DRA015383            | SAMD00567465 | E-GEAD-584           |
| MORF <sub>WH1</sub> -FLAG rep2(ChIP)     | DRA015383            | SAMD00567466 | E-GEAD-584           |

**Supplementary Table 5.** Cryo-EM data collection statistics. Related to Figure 8.

|                                                     | MORF <sub>WH1-WH2</sub> -<br>nucleosome - scFv<br>(EMDB-27243) |
|-----------------------------------------------------|----------------------------------------------------------------|
| <b>Data collection and processing</b>               |                                                                |
| Magnification                                       | 56,000                                                         |
| Voltage (kV)                                        | 200                                                            |
| Electron exposure (e <sup>-</sup> /Å <sup>2</sup> ) | 43.2                                                           |
| Defocus range (μm)                                  | 0.8-1.8                                                        |
| Pixel size (Å)                                      | 0.91                                                           |
| Symmetry imposed                                    | C1                                                             |
| Initial particle images (no.)                       | 219,800                                                        |
| Final particle images (no.)                         | 4,926                                                          |
| Map resolution (Å)                                  | 7.03                                                           |
| FSC threshold                                       | 0.143                                                          |
| Map resolution range (Å)                            | 5.8-20                                                         |
